# Supplementary material for: NGS Custom Panel Implementation in Patients with Non-Syndromic Autism Spectrum Disorders in the Clinical Routine of a Tertiary Hospital
Source: MDPI journal article supplement (doi:10.3390/genes14112091), 2023-11-17
Supplement: s1 [file s1]

**Table S1. Supplemental data.** List of the 311 genes selected and included in the AutismSeq NGS custom panel.

|          |          |         |          |         |          |          |         |         |
|----------|----------|---------|----------|---------|----------|----------|---------|---------|
| ACSL4    | ADNP     | ADSL    | AFF2     | AHDC1   | AHI1     | ALDH5A1  | ANK2    | ANK3    |
| ANKRD11  | ARHGEF9  | ARID1B  | ARX      | ASH1L   | ASTN2    | ASXL3    | ATP2B2  | ATRX    |
| AUTS2    | BAZ2B    | BCKDK   | BCL11A   | BDNF    | BPTF     | BRAF     | BRPF1   | BRWD3   |
| C12orf57 | CACNA1A  | CACNA1B | CACNA1C  | CACNA1D | CACNA1E  | CACNA2D3 | CADPS2  | CAMK2A  |
| CAMK2B   | CDKL5    | CELF4   | CEP290   | CHD1    | CHD2     | CHD3     | CHD5    | CHD7    |
| CHD8     | CHRNA4   | CHRNA7  | CIC      | CLCN4   | CMIP     | CNKSR2   | CNOT3   | CNTN4   |
| CNTNAP2  | COL4A3BP | CREBBP  | CTCF     | CTNNB1  | CUL3     | CUX2     | CYFIP1  | DDX3X   |
| DEAF1    | DEPDC5   | DHCR7   | DHX30    | DISC1   | DLG4     | DLGAP2   | DMD     | DMPK    |
| DNM1     | DNMT3A   | DPP10   | DPYD     | DPYSL2  | DSCAM    | DYRK1A   | EEF1A2  | EHMT1   |
| EIF4E    | ELAVL3   | ELN     | EP300    | EP400   | EPHB2    | FAT1     | FBXO11  | FGD1    |
| FMR1     | FOLR1    | FOXP1   | FOXP2    | FRYL    | GABRA4   | GABRB2   | GABRB3  |         |
| GAMT     | GIGYF1   | GLRA2   | GNAI1    | GNB1    | GRIA1    | GRIA2    | GRIA3   | GRIN1   |
| GRIN2A   | GRIN2B   | GRIP1   | GRM5     | HCN1    | HDAC8    | HDLBP    | HECTD4  | HECW2   |
| HEPACAM  | HIRA     | HIVEP2  | HNRNP2   | HNRNPU  | HOMER1   | HOXA1    | HRAS    | IQSEC2  |
| IRF2BPL  | ITPR1    | JMJD1C  | KANSL1   | KAT6A   | KCNB1    | KCND2    | KCNJ10  | KCNJ11  |
| KCNQ2    | KCNQ3    | KDM5C   | KDM6A    | KDM6B   | KIAA0232 | KIF5C    | KMT2A   | KMT2C   |
| KMT2D    | KMT2E    | KMT5B   | KRAS     | LDB1    | LRP1     | LRRC4C   | MAGEL2  | MAOA    |
| MAP2     | MAP2K1   | MAPK3   | MAPT     | MBD5    | MDGA2    | MECP2    | MED12   | MED13   |
| MED13L   | MEF2C    | MTF1    | MTOR     | MUC5B   | MYO9B    | MYT1L    | NAA15   | NACC1   |
| NBEA     | NCOA1    | NEXMIF  | NF1      | NFIA    | NFIX     | NIPBL    | NLGN2   | NLGN3   |
| NLGN4X   | NR2F1    | NR4A2   | NRXN1    | NRXN2   | NRXN3    | NSD1     | NTNG1   | NTRK2   |
| OPHN1    | PACS1    | PACS2   | PAFAH1B1 | PAK2    | DLG1     | PAX5     | PAX6    | PCDH10  |
| PCDH19   | PCDH9    | PDE4A   | PEX7     | PHF12   | PHF2     | PHF21A   | PHIP    | PIK3R2  |
| POGZ     | PPM1D    | PPP2R1A | PPP2R5D  | PPP3CA  | PPP5C    | PQBP1    | PRR12   | PTCHD1  |
| PTEN     | PTK7     | PTPN11  | QRICH1   | RAB39B  | RAI1     | RALGAPA1 | RALGAPB | RAPGEF4 |
| RBFOX1   | RELN     | RERE    | RFWD2    | RFX3    | RIMS3    | RORA     | RORB    | RPL10   |
| SATB2    | SCN1A    | SCN2A   | SCN8A    | SET     | SETBP1   | SETD2    | SETD5   | SHANK1  |
| SHANK2   | SHANK3   | SIK1    | SIN3A    | SLC6A1  | SLC6A8   | SLC7A5   | SLC9A6  | SMAD4   |
| SMARCA2  | SMARCA4  | SMARCC2 | SMC1A    | SMC3    | SND1     | SNRPN    | SON     | SOX11   |
| SOX5     | SPAST    | SPEN    | SPRED1   | SPTAN1  | SPTBN1   | SRPR     | STAG1   | STXBP1  |
| SYN1     | SYNCRIP  | SYNGAP1 | TAF1     | TBL1XR1 | TBR1     | TCF20    | TCF4    | TCF7L2  |
| TLK2     | TM9SF4   | TMLHE   | TNRC6B   | TRAF7   | TRIO     | TRIP12   | TRRAP   | TSC1    |
| TSC2     | UBE3A    | UBE3C   | UBR4     | UPF3B   | USP9X    | VEZF1    | VPS13B  | WAC     |
| WASF1    | WDFY3    | WDR26   | WDR45    | WNK3    | YWHAG    | YY1      | ZBTB18  | ZBTB20  |
| ZEB2     | ZMYND11  | ZMYND8  | ZNF292   | ZNF462  |          |          |         |         |

**Table S2 Supplemental data.** Cases with variants used in the validation of the AutismSeq panel

|                                                        |                                             |
|--------------------------------------------------------|---------------------------------------------|
| NM_001042492.3( <i>NF1</i> ):c.2T>G (p.Met1Arg)        | Síndrome Neurofibromatosis 1 (OMIM #162200) |
| NM_001374258.1( <i>BRAF</i> ):c.1712G>C (p.Trp571Ser)  | Síndrome Noonan 7 (OMIM #613706)            |
| NM_004380.3( <i>CREBBP</i> ):c.5905C>T (p.Gln1969Ter)  | Síndrome Rubinstein-Taybi (OMIM #180849)    |
| NM_022455.5( <i>NSD1</i> ):c.1262G>A (p.Trp421Ter)     | Síndrome Sotos (OMIM #117550)               |
| NM_022552.5( <i>DNMT3A</i> ):c.2645G>T (p.Arg882Leu)   | Síndrome Tatton-Brown-Rahman (OMIM #615879) |
| NM_014141.6( <i>CNTNAP2</i> ):c.97+1G>A                | Síndrome Pitt-Hopkins-like (OMIM #610042)   |
| NM_001372044.2( <i>SHANK3</i> ):c.574A>T (p.Lys192Ter) | Síndrome Phelan-McDermid (OMIM #606232)     |
| NM_130839.5( <i>UBE3A</i> ):c.2618A>T (p.Ter873Leu)    | Síndrome Angelman (OMIM #105830)            |
| NM_014795.4( <i>ZEB2</i> ):c.3211T>C (p.Ser1071Pro)    | Síndrome Mowat-Wilson (OMIM #235730)        |
| NM_152594.3( <i>SPRED1</i> ):c.148C>T (p.Gln50Ter)     | Síndrome Legius (OMIM #611431)              |
